# Supplementary material
Source: MDPI journal article supplement (https://www.mdpi.com/2075-163X/10/7/602)
Supplement: s1 [file s1]

Archive with 2 entries (2 files):
- minerals-849868 supplementary/minerals-849868 supplementary figures.pdf
- minerals-849868 supplementary/minerals-849868 supplementary tables.xlsx
