# Supplementary material
Source: MDPI journal article supplement (https://www.mdpi.com/2075-163X/10/7/602)
Supplement: s1 [file s1 › minerals-849868 supplementary/minerals-849868 supplementary figures.pdf]

# Supplementary Materials: Influence of Genetic Processes on Geochemistry of Fe-oxy-hydroxides in Supergene Zn Non-Sulfide Deposits

Licia Santoro, Francesco Putzolu, Nicola Mondillo, Maria Boni and Richard Herrington

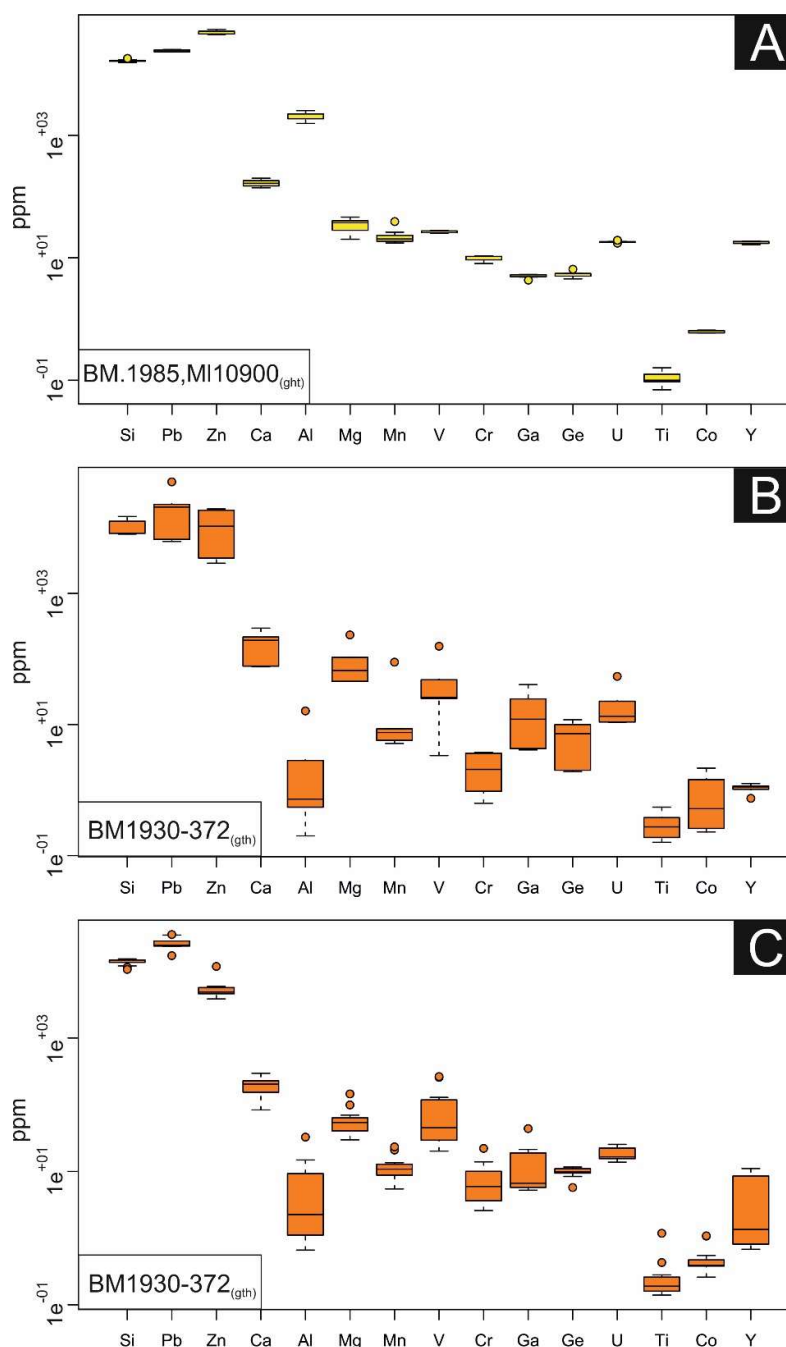

**Figure S1.** Boxplots showing the chemical composition of the studied FeO/OH from Kabwe [Error! Reference source not found.]: (A) Goethite from Kabwe 1 (sample ID: MI10900), (B) and (C) Goethite and hematite from Kabwe 2, respectively (sample ID: BM1930-372).

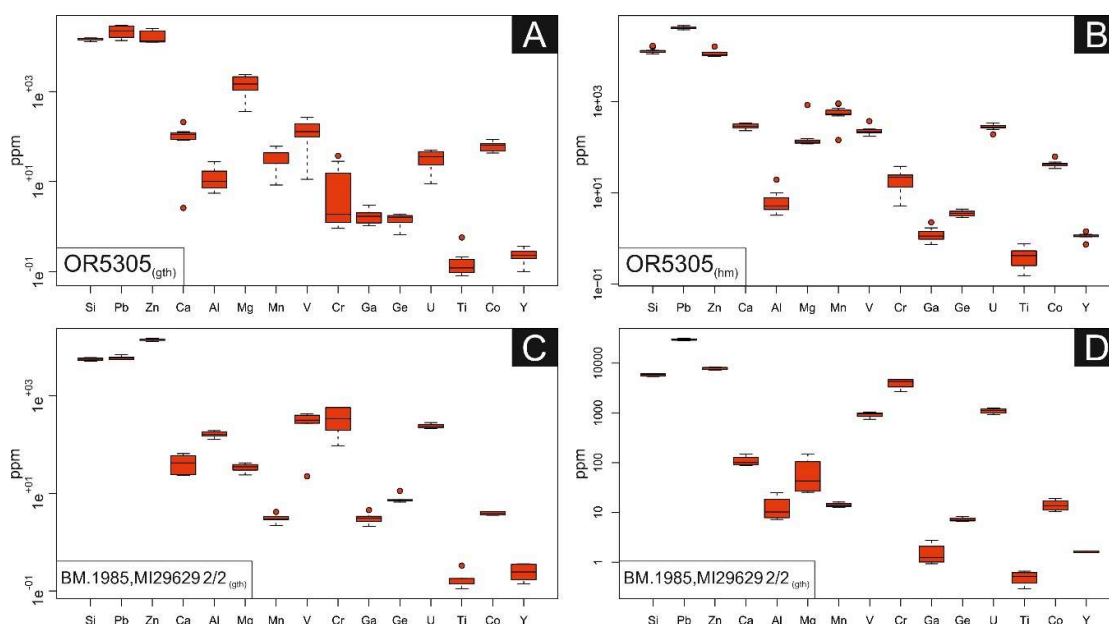

**Figure S2.** Boxplots showing the chemical composition of the studied FeO/OH from Kabwe [Error! Reference source not found.]: (A) Goethite from Kabwe 3 (sample ID: OR5305), (B) Hematite from Kabwe 3 (sample ID: OR5305), (C) Goethite from Kabwe 3 (sample ID: BM.1985,MI29629 2/2), (D) Hematite from Kabwe 3 (sample ID: BM.1985,MI29629 2/2).

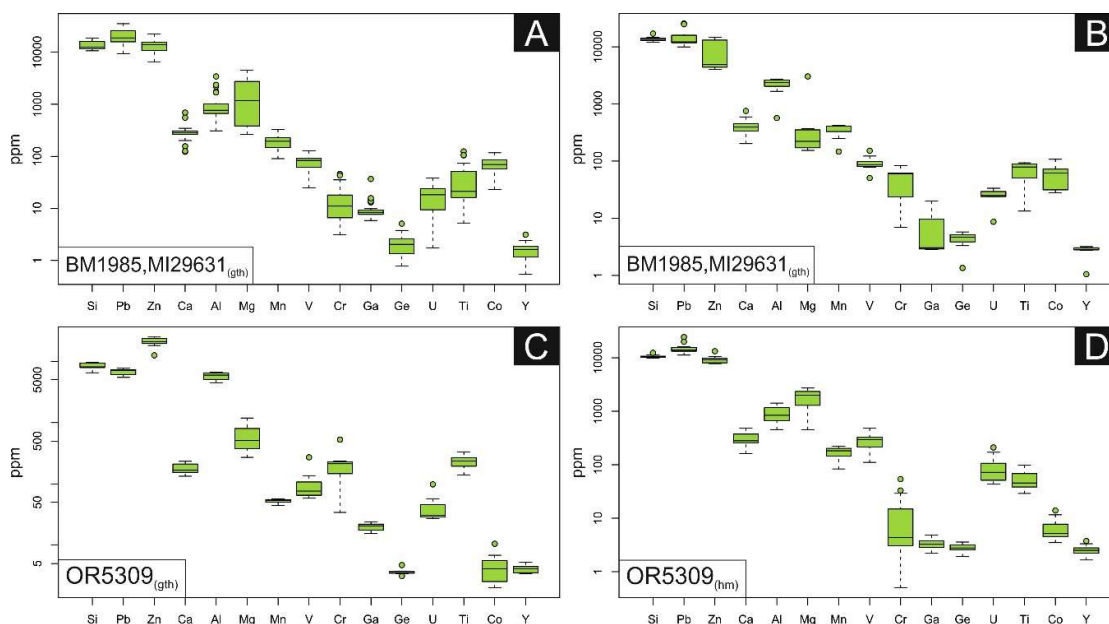

**Figure S3.** Boxplots showing the chemical composition of the studied FeO/OH from Kabwe [Error! Reference source not found.]: (A) Goethite from Kabwe 4 (sample ID: BM.1985,MI29631), (B) Hematite from Kabwe 4 (sample ID: BM.1985,MI29631), (C) Goethite from Kabwe 4 (sample ID: OR5309), (D) Hematite from Kabwe 4 (sample ID: OR5309).
