# Supplementary material
Source: MDPI journal article supplement (https://www.mdpi.com/2075-163X/10/7/602)
Supplement: s1 [file s1 › minerals-849868 supplementary/minerals-849868 supplementary tables.xlsx]

## Sheet: Table S1
Table S1. Mineral chemistry of goethites from the Zn-nonsulfides of Cristal and Kabwe. Major and minor elements were analyzed through EMPA (wt%), while trace elements were analyzed through LA-ICP-MS (ppm)
		internal-standard--57Fe	29Si	208Pb	66Zn		43Ca	27Al	24Mg	55Mn	51V	53Cr	60Ni	71Ga	72Ge	238U	47Ti	59Co	89Y	139La	140Ce
	Specimen point	%					ppm
	of analysis
CRISTAL	CR13-1-Sit-3-Sp-2	41.79	1.19817	0.262966	6.10172		135.534	4347.1	45.4853	817.032	11.2015	0.930508	7.30144	0.742735	70.008	0.599428	24.9901	9.12934	32.5809	0.863824	5.97428	CR13-1-Sit-3-Sp-2
	CR13-1-Sit-3-Sp-3	43.74	1.23378	0.263395	6.34221		151.563	4585.91	51.9187	858.887	15.0994	1.7619	8.54801	0.787584	73.0199	0.652708	29.6901	9.95246	35.385	1.10878	7.28307	CR13-1-Sit-3-Sp-3
	CR13-1-Sit-3-Sp-4	44.43	1.28251	0.393468	6.39079		213.471	4689.68	70.7724	2701.9	12.9177	<0.861	6.23833	1.14123	62.5505	0.628556	107.49	12.1138	38.233	1.80189	44.1621	CR13-1-Sit-3-Sp-4
	CR13-1-Sit-6-Sp-2	49.27	1.57814	0.463254	4.36136		209.986	1835.85	76.2189	227.848	9.23645	8.00005	8.45745	0.477973	123.111	0.746084	6.58314	2.5318	21.1515	0.531289	2.42731	CR13-1-Sit-6-Sp-2
	CR13-1-Sit-6-Sp-3	48.91	1.35081	0.384178	4.91533		176.159	1570.3	75.7116	423.093	8.74518	0.756059	7.5248	0.5494	102.375	0.618193	1.56154	4.43501	19.525	0.472004	3.13319	CR13-1-Sit-6-Sp-3
	CR13-1-Sit-6-Sp-4	49.07	1.57987	0.451309	4.69354		244.767	1940.28	82.3842	285.394	10.0204	0.890473	9.04703	0.528746	119.69	0.7475	7.93894	3.72453	22.4774	0.626978	3.03938	CR13-1-Sit-6-Sp-4
	CR13-1-Sit-7-Sp-2	41.42	1.04071	0.210489	4.42433		271.8	4618.9	163.178	1021.55	71.948	25.2921	17.7964	1.02632	109.066	0.679411	14.2707	16.4391	79.9158	1.47896	16.5749	CR13-1-Sit-7-Sp-2
	CR18-19-Site-9-Sp-1	51.93	1.33126	0.0266515	6.33485		506.179	1473.7	168.93	4296.52	45.4174	6.3103	41.0481	27.1451	510.572	2.76014	30.3787	49.1308	119.698	2.18543	42.907	CR18-19-Site-9-Sp-1
	CR18-19-Site-9-Sp-2	52.11	1.39653	0.0256315	6.52401		350.315	1316.35	160.42	4198.81	37.6003	2.67154	37.0861	20.3609	492.424	3.03454	29.9499	61.6789	105.982	1.63697	40.9142	CR18-19-Site-9-Sp-2
Max.			1.57987	0.463254	6.52401		506.179	4689.68	168.93	4296.52	71.948	25.2921	41.0481	27.1451	510.572	3.03454	107.49	61.6789	119.698	2.18543	44.1621
Min.			1.04071	0.0256315	4.36136		135.534	1316.35	45.4853	227.848	8.74518	0.756059	6.23833	0.477973	62.5505	0.599428	1.56154	2.5318	19.525	0.472004	2.42731
Mean			1.33242	0.275705	5.56535		251.086	2930.9	99.4466	1647.89	24.6874	5.82662	15.8942	5.86222	184.757	1.16295	28.0948	18.7929	52.7721	1.18957	18.4906
St. Dev			0.173709	0.166124	0.936604		115.846	1559.22	49.9929	1647.4	22.2215	8.31854	13.5955	10.2863	180.953	0.987059	31.7973	21.4444	38.7162	0.615221	18.6298
KABWE	BM1930-372_1	56.47	1.49221	5.03734	1.85473		294.959	2.83281	105.655	89.4361	156.404	3.64002	7.77979	40.6287	5.48884	54.2867	0.354193	2.16274	1.26327	0.420029	0.177162
	BM1930-372_2	55.48	1.20198	1.91293	0.288707		205.212	<d.l.	45.7122	7.31025	25.0078	3.77643	1.82717	4.09534	9.05114	10.8087	<d.l.	0.22897	1.12214	0.57423	0.189104
	BM1930-372_3	55.61	1.25519	2.27821	0.34694		179.687	<d.l.	45.6826	7.83894	25.9284	<d.l.	2.18123	4.31439	9.98098	10.9211	<d.l.	0.261908	1.12459	0.630146	0.178794
	BM1930-372_4	55.56	1.26149	2.24625	0.390171		216.084	<d.l.	46.6143	8.59512	26.0807	2.75905	2.49745	4.85026	11.8641	11.0157	<d.l.	0.289287	1.15222	0.793945	0.151366
	BM1930-372_5	55.94	0.802254	0.667311	1.95128		76.2381	16.1335	232.835	5.16353	48.198	0.95594	12.688	19.2751	2.00688	22.6141	<d.l.	1.43536	0.749419	1.13796	2.14536
	BM1930-372_6	54.08	0.824279	0.621221	1.7294		78.0017	0.867973	86.3961	5.73953	3.36648	<d.l.	7.9375	24.5806	1.90875	15.7005	<d.l.	0.749277	1.02923	0.109829	0.126027
	BM.1985,MI29631_1	55.25	1.8558	0.939354	1.07919		122.307	1019.76	4511.64	90.4589	62.9455	11.0629	43.0371	5.84724	0.781249	1.74516	70.3683	96.6811	0.621507	0.0359465	0.444985
	BM.1985,MI29631_2	55.44	1.06721	1.65475	0.658594		346.246	606.536	3441.73	129.219	60.3267	9.81591	95.8473	7.66331	1.08029	6.73546	14.4011	57.457	1.28033	0.0888697	0.875791
	BM.1985,MI29631_3	56.72	1.18678	1.66009	1.22441		286.451	591.701	4151.47	147.767	50.6691	11.5751	37.9932	9.88355	1.74604	9.45458	15.3599	69.7264	0.96604	0.106556	0.656623
	BM.1985,MI29631_4	57.33	1.19322	1.84402	0.991906		281.301	732.251	3216.06	150.763	61.4729	9.59081	35.3286	8.4006	1.65215	8.86045	16.2331	86.8084	1.23578	0.10539	0.876207
	BM.1985,MI29631_5	55.77	1.09308	1.89457	1.50542		329.207	591.802	2036.91	154.208	59.6081	20.2514	36.8389	8.96686	1.27219	9.55907	15.491	71.654	1.17042	0.112123	0.617613
	BM.1985,MI29631_6	57.8	1.21252	1.93104	1.12938		330.038	768.757	2688.81	157.695	71.0791	16.8962	53.1327	8.95609	1.15901	10.0424	19.8508	89.1153	1.35394	0.10779	0.847348
	BM.1985,MI29631_7	57.27	1.4175	2.56847	2.16561		260.333	793.763	522.737	191.129	76.9386	6.32529	107.215	6.55961	2.0813	18.2905	17.0954	102.839	1.6283	0.162164	0.77269
	BM.1985,MI29631_8	55.48	1.52409	2.86786	1.56881		201.105	822.474	384.562	204.25	88.7958	6.50013	29.336	6.46435	3.12395	28.8823	20.5695	46.0796	1.99972	0.263589	1.20988
	BM.1985,MI29631_9	55.48	1.28228	1.3924	0.908457		691.146	2208.76	264.677	206.606	102.645	45.9031	28.4902	13.0794	5.09356	22.6932	74.5129	22.9811	3.12652	0.468984	3.4446
	BM.1985,MI29631_10	52.66	1.15356	1.25979	1.20376		155.822	2367.13	338.33	206.895	111.236	20.0522	36.431	14.202	3.62758	23.5796	104.854	30.7904	2.42423	0.207867	1.89772
	BM.1985,MI29631_11	57.6	1.72108	3.30361	1.65297		264.655	702.841	327.017	232.977	90.5625	6.60231	29.047	8.34492	2.12893	35.4085	21.203	57.9658	1.66404	0.287576	1.36005
	BM.1985,MI29631_12	57.32	1.2483	1.55273	2.23603		226.19	3430.72	893.075	248.409	127.935	35.2576	66.1014	36.7485	3.17873	20.2026	124.323	50.8693	2.26313	0.178138	1.51372
	BM.1985,MI29631_13	55.2	1.22074	2.2071	1.46729		552.141	1727.64	960.484	326.768	83.7587	43.1641	36.926	13.6598	3.76504	23.8552	57.7612	43.9672	1.85569	0.166498	2.05865
	BM.1985,MI29631_14	56.3	1.39313	2.30591	1.28175		276.308	892.64	1476.18	194.707	110.3	18.0866	45.8302	8.63742	2.03934	20.2213	25.8641	77.7638	2.0591	0.189996	1.4568
	BM.1985,MI29631_15	57.98	1.49547	2.59853	1.53358		269.921	833.855	1173.28	198.998	105.459	15.5901	39.8164	8.26274	1.93706	21.7358	24.0092	71.1099	1.89956	0.187644	1.56012
	BM.1985,MI29631_16	56.29	1.19442	1.87541	1.00803		262.341	796.975	2697.07	158.127	82.0754	12.6884	35.719	8.42186	1.42909	10.9167	22.2272	77.8402	1.67779	0.128027	0.874648
	BM.1985,MI29631_17	57.16	1.76923	3.53457	1.52906		291.07	722.751	353.414	252.524	92.0478	6.35873	37.8766	7.61958	2.25725	38.1077	21.5727	62.0362	1.81544	0.357256	1.7411
	BM.1985,MI29631_18	56.49	1.64972	3.14187	1.66072		310.108	693.203	563.296	199.803	89.43	7.15478	36.7399	7.182	2.26827	27.7147	19.0508	58.8048	1.69313	0.280692	1.12358
	BM.1985,MI29631_19	57.8	1.73199	3.27897	1.74903		302.866	692.413	333.087	226.26	84.1143	6.06594	35.7801	8.2987	2.52226	31.9784	21.3908	65.8856	1.50436	0.288773	1.26858
	BM.1985,MI29631_20	57.9	1.72608	3.40371	1.58452		269.877	667.972	332.43	241.908	88.0866	6.04883	47.5145	7.83631	2.62872	36.8607	18.8311	65.8028	1.73023	0.345434	1.59854
	BM.1985,MI29631_21	50.35	1.12009	1.5912	1.4414		307.951	1749.59	1103.09	256.798	68.3867	26.6965	39.0473	15.7377	2.56617	13.4345	51.3265	47.9454	1.56973	0.135783	1.6823
	BM.1985,MI29631_22	53.64	1.63047	1.10479	1.40839		126.015	1688.96	2996.88	128.492	92.5716	15.0934	50.3011	9.27199	1.34625	9.73498	105.213	86.2105	0.948048	0.0637358	0.647526
	BM.1985,MI29631_23	55.96	1.11619	1.50285	0.946811		300.122	309.777	3615.74	111.261	24.8442	3.13699	68.1009	8.51486	1.02857	4.41148	5.26392	117.047	0.541153	0.0518874	0.243752
	BM.1985,MI29631_24	55.75	1.15745	1.70012	1.19719		289.283	477.117	2745.31	127.901	39.5105	9.44115	53.4087	8.58583	1.19298	6.76893	10.4143	80.1966	0.907653	0.0826547	0.368708
	BM.1985,MI29631_25	56.03	1.15368	1.91472	0.871316		265.145	605.526	2489.01	135.32	35.4188	7.99577	52.0305	7.67027	1.81098	8.1448	10.7837	85.5659	0.926603	0.0848939	0.493771
	OR5305_1	53.7	1.50468	1.36654	2.50727		<d.l.	27.4735	358.319	41.9125	265.863	2.31306	41.8482	2.99391	1.74784	46.5111	<d.l.	43.0849	0.362853	0.0115701	0.0253375
	OR5305_2	53.53	1.28427	1.40314	2.48726		<d.l.	8.93451	1107.62	8.37149	11.2165	37.3191	25.2021	1.03365	0.663235	31.1955	0.0785607	49.1976	0.100051	0.00139014	0.0253648
	OR5305_3	53.74	1.50942	1.81636	2.01155		109.087	7.51117	1043.91	26.047	104.962	28.2076	32.1899	2.06743	1.86064	49.6517	<d.l.	46.8737	0.239505	0.00569615	0.0109033
	OR5305_4	53.34	1.50899	2.2892	1.26081		90.1972	6.80353	2399.9	24.4605	114.615	1.34504	40.2545	1.11544	1.0541	17.0365	<d.l.	66.149	0.215297	0.00308974	0.013848
	OR5305_5	54.16	1.55414	2.17013	1.35471		128.249	18.939	1294.11	60.6866	221.454	2.31058	41.5004	1.9539	1.68904	9.01134	<d.l.	86.7245	0.290816	<0.00412	0.124974
	OR5305_6	53.17	1.55697	2.91142	1.26456		116.144	15.1202	2188.25	39.3909	164.839	1.11678	32.5183	1.78648	1.74914	30.2247	<d.l.	64.9931	0.201106	0.00549259	0.0355029
	OR5305_7	53.2	1.50047	2.84559	1.32032		112.952	11.445	2085.38	44.2227	142.664	0.907854	30.3075	1.59195	1.53508	44.9851	<d.l.	65.2889	0.188914	0.00427962	0.0362339
	OR5305_8	54.28	1.31908	2.9516	1.26743		209.407	5.50198	1653.22	42.552	91.9404	1.42895	41.1689	1.28513	1.39778	39.425	<d.l.	73.2905	0.267812	0.00522599	0.0354181
	OR5309_1	50.7833	0.779825	0.548291	2.37658		215.592	6167.65	293.375	49.9434	58.2602	235.622	10.4183	20.637	3.42769	27.9857	281.556	2.29933	3.38048	0.33936	0.759191
	OR5309_2	50.8933	0.934737	0.655266	2.10104		144.559	5417.19	513.42	50.6054	80.1924	212.687	10.755	18.3166	3.54889	29.0963	151.46	4.28962	3.55239	0.595207	0.801157
	OR5309_3	52.1825	0.968884	0.769506	1.2553		<205	4471.54	1189.54	44.5372	271.399	34.1551	10.838	15.6049	3.61155	98.0272	139.207	4.09793	5.22543	1.71441	0.982557
	OR5309_4	51.206	0.653289	0.54644	2.48907		206.666	6701.42	270.858	56.727	58.8639	222.903	10.4418	23.8118	4.72369	27.1796	329.793	2.01394	3.53722	0.321089	0.818129
	OR5309_5	51.8933	0.800173	0.707445	2.37428		166.432	6636.75	450.342	53.1276	71.6904	205.634	11.1116	23.0121	3.77466	34.8222	236.313	2.78268	4.24745	0.630026	1.04891
	OR5309_6	52.3875	0.944836	0.70828	1.8161		163.121	5965.03	727.688	54.6179	76.2241	87.4033	16.8146	20.9483	3.51528	30.7822	236.705	6.8261	4.65894	0.764902	1.10677
	OR5309_7	52.4367	0.812287	0.753828	2.09188		233.341	4667	873.998	55.6169	133.947	527.443	15.5519	16.9211	3.1217	57.1672	254.547	10.499	4.10948	1.02614	0.781178
	BM.1985,MI10900_1	49.34	1.70867	2.34276	5.06867		145.391	2541.74	20.0661	39.0503	26.3643	10.2537	3.13006	4.84933	4.53236	18.2227	<d.l.	0.658917	16.4387	0.334042	2.31379
	BM.1985,MI10900_2	46.72	1.80419	2.29652	5.397		197.674	2367.39	42.7059	20.3055	27.3101	9.0099	3.48921	4.31468	4.89901	17.3355	<d.l.	0.592975	16.3919	0.308635	2.16782
	BM.1985,MI10900_3	46.65	1.61822	2.29243	4.44156		198.807	2089.3	46.1218	18.7677	26.0476	10.7104	3.05075	4.9891	5.30157	18.4216	<d.l.	0.647236	18.3113	0.388322	2.61197
	BM.1985,MI10900_4	45.73	1.54719	2.47673	4.76797		164.681	1918.66	37.979	20.4192	27.6404	10.8185	3.52699	5.31189	5.53576	18.1553	<d.l.	0.63906	17.9741	0.378917	2.55185
	BM.1985,MI10900_5	48.045	1.63227	2.51955	4.9404		165.472	1556.65	24.9259	26.1219	27.9216	8.05493	3.91429	5.25714	6.49869	18.0066	<d.l.	0.636882	18.721	0.372858	2.40434
	BM.1985,MI10900_6	47.78	1.61829	2.39812	4.56852		153.451	2102.24	37.1976	18.4188	25.2673	9.56331	3.09594	5.09348	5.0891	19.3184	<d.l.	0.599645	18.4473	0.409007	2.69125
	BM.1985,MI10900_7	46.82	1.63124	2.45862	4.4904		139.058	1806.39	31.4258	17.4776	25.2914	10.3218	3.20985	5.3511	5.51564	17.9857	0.15544	0.5929	18.2317	0.399419	2.52251
	BM.1985,MI29629 2/2_1	57.4833	0.53306	0.555867	1.37964		<d.l.	150.007	23.8855	2.19581	22.4005	93.8753	4.96895	2.11145	7.07043	284.152	0.329902	3.5711	0.13639	0.00710262	0.0382174
	BM.1985,MI29629 2/2_2	55.685	0.610902	0.62306	1.5022		<d.l.	127.842	30.1254	2.8514	401.558	196.937	4.3753	3.04795	6.6315	260.025	0.140776	3.73182	0.172703	0.00650297	0.0321637
	BM.1985,MI29629 2/2_3	56.41	0.594377	0.625938	1.41342		54.298	159.605	32.1019	3.115	426.569	332.941	4.48734	3.22595	7.36357	237.058	<d.l.	4.26602	0.228683	0.00631845	0.0434625
	BM.1985,MI29629 2/2_4	56.01	0.566213	0.555278	1.42499		59.6144	166.879	42.4612	2.85937	274.884	342.49	4.88645	3.39021	7.04921	220.748	<d.l.	4.12778	0.256433	0.00619635	0.042809
	BM.1985,MI29629 2/2_5	56.54	0.56546	0.572222	1.44421		<d.l.	183.03	39.2953	3.32258	320.684	576.141	5.33118	4.54873	7.43128	214.297	<d.l.	4.25994	0.364543	0.00951819	0.0462714
	BM.1985,MI29629 2/2_6	56.41	0.51767	0.696615	1.3001		65.4907	194.276	38.2937	4.16626	316.381	579.255	4.80943	2.65107	11.2821	239.207	<d.l.	3.60259	0.348661	0.010588	0.0554992
Max.			1.8558	5.03734	5.397		691.146	6701.42	4511.64	326.768	426.569	579.255	107.215	40.6287	11.8641	284.152	329.793	117.047	18.721	1.71441	3.4446
Min.			0.51767	0.54644	0.288707		54.298	0.867973	20.0661	2.19581	3.36648	0.907854	1.82717	1.03365	0.663235	1.74516	0.0785607	0.22897	0.100051	0.00139014	0.0109033
Mean			1.24968	1.8415	1.87597		219.015	1464.41	1035.18	95.5121	102.74	73.3272	27.7288	9.48783	3.65489	46.2834	68.6111	38.7222	3.42211	0.27965	0.961535
St. Dev			0.373079	0.970139	1.19945		114.259	1833.63	1203.74	88.6085	94.4887	141.942	23.1956	8.24922	2.65452	68.8804	90.2127	35.8586	5.45632	0.322059	0.884984
d.l. detection limit

## Sheet: Table S2
Table S2. LA-ICP-MS of hematites from Zn-nonsulfides of Kabwe.
		internal-standard--57Fe	29Si	208Pb	66Zn		43Ca	27Al	24Mg	55Mn	51V	53Cr	60Ni	71Ga	72Ge	238U	47Ti	59Co	89Y	139La	140Ce
	Specimen point	%					ppm
	of analysis
KABWE	BM1930-372_1	60.79	1.47823	3.50352	0.530384		83.4732	9.25898	29.766	12.8097	118.089	12.9746	2.74535	17.7298	11.1984	16.9527	<d.l.	0.394474	11.0399	19.0124	23.6767
	BM1930-372_2	59.73	1.38653	3.3942	0.569371		154.134	7.68697	39.0749	11.8468	128.774	13.9069	3.23972	18.7823	10.6499	16.52	0.175779	0.382291	11.0051	21.1252	22.6473
	BM1930-372_3	60.66	1.40807	3.56156	0.578286		119.551	9.89235	40.5763	13.5025	108.888	7.9073	3.88179	19.198	10.0478	15.538	<d.l.	0.38519	10.2851	24.4251	25.8897
	BM1930-372_4	61.26	1.20778	2.64312	0.386509		141.448	4.31392	31.4723	11.4099	72.674	6.99898	2.7453	14.1935	9.28833	13.7621	<d.l.	0.262934	7.62141	13.2005	16.619
	BM1930-372_5	61.7	1.15169	2.84746	1.18523		<d.l.	32.6696	145.251	20.9166	257.359	10.0167	8.13271	43.8832	8.40932	25.4059	<d.l.	1.06691	4.37642	9.22718	11.9099
	BM1930-372_6	54.53	1.06916	1.72086	0.596262		295.761	1.65289	99.2767	8.79313	20.1753	2.8204	7.9468	6.01805	5.7335	15.4591	0.429508	1.08367	0.805088	0.62385	1.31581
	BM1930-372_7	63.02	1.36552	2.47812	0.44187		228.725	14.81	69.7474	23.3287	264.193	22.1292	3.09613	21.3363	11.6106	20.2117	<d.l.	0.547915	8.53284	11.9504	18.2002
	BM1930-372_8	62.7	1.43438	2.46478	0.449633		211.729	1.11438	59.8376	10.2316	45.1845	3.63264	2.54718	5.76821	10.953	15.7681	<d.l.	0.372806	1.34812	0.595982	0.242822
	BM1930-372_9	62.14	1.4703	2.39077	0.462196		247.066	0.658871	58.0974	9.89069	29.4349	2.58154	2.87437	5.22114	9.43391	14.8853	<d.l.	0.386898	1.09918	0.607936	0.246559
	BM1930-372_10	63.68	1.45415	2.37244	0.467249		203.568	0.968247	54.1935	5.61206	24.5454	5.12351	2.80894	6.11803	9.83717	22.3591	<d.l.	0.39835	0.683483	0.0975136	0.145652
	BM1930-372_11	63.15	1.53146	2.47352	0.479439		242.92	0.873098	63.4663	10.8053	31.1249	3.49901	2.67798	5.77172	11.6207	16.5568	<d.l.	0.384082	1.25165	0.758868	0.345503
	BM1930-372_12	63.29	1.54193	2.3981	0.488568		212.22	1.76466	53.9729	5.55077	27.4274	5.21883	2.92955	6.64948	9.70183	22.4115	<d.l.	0.423346	0.727121	0.102235	0.168472
	BM1930-372_13	62.23	1.47322	2.55422	0.525794		202.67	2.25075	54.1989	5.4509	44.4229	5.9439	3.14018	5.70452	9.80589	23.4139	<d.l.	0.469051	0.68999	0.109725	0.254216
	BM.1985,MI29631_1	61.69	1.20024	2.55198	1.45685		454.486	567	3029.81	146.765	50.4992	9.07345	47.9906	9.7261	1.34613	8.6925	13.3334	107.567	1.0518	0.0777759	0.739995
	BM.1985,MI29631_2	62.97	1.2883	1.20949	0.487149		392.074	2307.55	190.606	380.077	85.7086	62.0319	15.833	2.9075	3.30813	29.3431	88.5681	52.9904	3.04794	0.397907	6.06746
	BM.1985,MI29631_3	61.69	1.34873	1.16048	0.399671		594.69	2342.04	221.633	402.299	80.622	61.6992	15.1965	2.83543	4.19271	23.5734	89.3959	68.0433	2.84826	0.439454	6.0421
	BM.1985,MI29631_4	61.79	1.34222	1.22033	0.438355		754.003	2562.33	170.431	406.817	77.8474	63.1747	16.0586	2.89498	3.86763	24.8128	93.3792	72.1653	2.79762	0.361507	5.83643
	BM.1985,MI29631_5	63.3	1.28941	1.17768	0.442787		201.992	2038.12	157.832	414.57	96.3867	53.822	12.9909	3.05661	5.17733	26.5946	50.9904	62.3012	2.75905	0.257839	4.8935
	BM.1985,MI29631_6	62.95	1.45157	0.994903	0.428836		391.192	2607.36	153.765	421.47	82.3606	59.4708	14.6566	2.86145	4.9173	24.0116	70.362	83.0863	2.80018	0.261454	4.62376
	BM.1985,MI29631_7	62.37	1.38297	1.5516	1.30779		332.46	2732.76	367.511	328.742	99.2461	83.0339	38.2164	19.8858	5.21828	25.2371	86.6141	29.3326	3.07831	0.259728	3.20922
	BM.1985,MI29631_8	60.7	1.41421	1.58958	1.3308		220.634	2610.52	352.049	248.785	152.005	23.5681	37.8716	13.248	4.6856	29.7179	79.0147	31.4572	3.03263	0.282426	2.48451
	BM.1985,MI29631_9	61.88	1.69947	2.47912	0.992803		342.839	1664.79	257.102	406.128	122.225	6.9752	18.7212	4.69802	5.77108	33.4664	41.83	28.0478	3.18977	0.31631	4.87351
	OR5305_1	60.51	1.57849	3.86487	1.60851		266.97	19.4355	839.548	143.735	372.353	5.13341	25.6524	2.25971	4.4091	191.461	<d.l.	62.0361	0.744456	0.0253554	0.236093
	OR5305_2	60.08	1.11665	4.08599	1.06899		336.282	4.99646	118.423	483.622	240.873	8.23191	13.0571	1.13487	2.88308	263.593	0.769231	39.3908	1.43316	0.0222049	1.8105
	OR5305_3	60.65	1.27805	3.75151	1.21047		293.584	6.84715	128.03	718.848	201.178	38.0977	14.143	1.26577	3.08374	270.95	0.311102	40.4455	1.0992	0.0177934	0.844772
	OR5305_4	59.76	1.67241	4.62276	1.0988		331.815	3.99128	144.759	512.387	173.568	5.31131	11.4409	0.898205	4.40313	307.399	<d.l.	39.5587	0.739215	0.0295993	0.425113
	OR5305_5	60.49	1.20329	3.99641	1.20788		277.026	10.0349	155.378	515.651	240.718	21.9429	15.5171	1.57439	3.76507	246	0.414375	43.7016	1.22675	0.027234	1.65732
	OR5305_6	60.99	1.30884	4.40415	1.04675		330.471	4.58217	141.85	559.609	215.786	18.7134	14.5114	0.954749	3.28291	320.88	0.507233	43.8563	1.15321	0.0208105	1.37404
	OR5305_7	60.31	1.27806	4.08605	1.04014		268.341	5.81059	138.448	535.255	211.676	22.3617	13.4151	1.1685	3.54656	290.795	<d.l.	44.1302	1.1709	0.0252497	1.50152
	OR5305_8	60.78	1.30327	4.05839	1.02993		246.594	5.34927	130.785	575.37	225.481	23.674	14.6552	1.12757	3.5194	286.306	0.524504	47.2583	1.15461	0.026983	1.50377
	OR5305_9	60.84	1.29043	4.11901	1.20789		314.039	8.58413	129.182	536.984	249.002	24.3034	16.9759	1.71109	4.05323	261.021	0.574421	42.3893	1.20336	0.0278501	1.5711
	OR5305_10	60.82	1.33008	4.14536	0.971149		229.626	4.0255	124.828	536.792	214.802	21.5995	13.8071	0.966566	3.79556	287.704	0.550884	45.2213	1.11697	0.0300473	1.49697
	OR5305_11	58.93	1.14361	3.99434	1.037		260.854	4.88209	120.655	892.336	220.666	24.6222	12.3412	1.0998	3.11548	268.707	0.425448	34.0371	1.15932	0.0309844	1.43976
	OR5305_12	60.59	1.21664	4.34789	0.985403		304.273	3.22459	118.856	906.994	192.462	24.7654	11.3368	0.735324	2.97359	338.808	<d.l.	34.6748	1.09279	0.0316956	1.2717
	BM.1985,MI29629 1/2_1	64.72	0.260515	1.25107	0.888152		72.3548	491.777	23.3053	9.39176	717.638	81.4111	1.73856	4.41046	8.74504	875.262	20.5085	5.54189	0.910235	0.100139	0.665464
	BM.1985,MI29629 1/2_2	63.3	0.476564	0.835888	1.5398		<d.l.	1297.92	32.241	3.59094	570.518	18.8137	4.6426	6.38748	17.6929	305.582	18.0851	3.38338	0.69244	0.0256665	0.139719
	BM.1985,MI29629 1/2_3	63.44	0.50402	0.93925	1.30608		84.3563	939.559	36.8868	4.03976	577.342	28.7475	3.69708	4.26891	17.0142	370.121	32.72	2.97393	1.07975	0.0273796	0.163934
	BM.1985,MI29629 1/2_4	63.58	0.629811	1.36537	1.09323		52.2394	572.961	21.4178	5.33329	785.491	10.1331	1.97475	1.81728	23.5104	460.758	35.839	2.5515	1.5687	0.0425501	0.265074
	BM.1985,MI29629 1/2_5	63.28	0.33025	1.06654	1.14184		85.2882	2081.88	50.0709	9.89315	2429.12	17.8307	5.85785	34.5677	5.25135	256.825	36.1731	12.6999	1.22106	0.116477	0.70845
	OR5309_1	60.88	1.03576	1.32577	0.972413		357.598	1420.96	2246.43	104.47	168.073	15.2409	6.72823	4.8155	2.96728	73.2102	97.782	5.47356	2.20051	0.852671	0.956899
	OR5309_2	59.285	1.04472	1.11964	0.927121		400.244	1175.04	2227.01	120.818	146.347	1.1527	4.75104	3.8107	2.5742	62.5682	66.487	4.75575	1.77273	0.834868	0.870188
	OR5309_3	62.6	1.07435	1.35991	0.792346		332.855	1148	1902.62	162.798	366.135	7.46311	6.37255	3.20774	3.57773	143.408	63.3484	11.0865	2.7746	2.11107	1.49859
	OR5309_4	59.33	1.06008	1.36404	0.938567		402.545	1140.85	2377.28	155.02	373.823	33.0135	5.63977	3.56394	2.69907	170.854	74.8294	5.41216	3.32727	2.5223	1.58107
	OR5309_5	60.5833	1.03466	1.29599	0.83199		256.233	883.232	1999.9	185.374	284.514	3.75987	3.94332	3.03155	3.17007	50.8551	44.0102	11.5592	2.47617	1.30579	1.73125
	OR5309_6	61.27	1.05037	1.37074	0.867912		270.962	793.791	1956.45	203.074	294.789	3.06161	3.22426	3.08322	2.94605	43.2957	39.7162	4.3322	2.2343	1.24621	1.53906
	OR5309_7	60.305	1.12573	1.54452	1.32492		257.93	730.326	1653.4	211.02	326.433	16.6964	2.92177	3.30326	2.93778	49.1442	36.2433	4.21195	2.54151	1.54397	1.80787
	OR5309_8	62.296	1.02237	1.46698	1.0621		219.049	716.662	672.518	193.704	299.424	53.8193	3.80848	3.68775	3.09303	77.0599	39.9926	4.44085	2.89222	1.44931	2.40243
	OR5309_9	61.215	1.23512	2.43184	1.02831		261.806	703.286	1176.56	221.771	273.952	29.1119	3.96385	3.18836	3.47752	51.2727	46.1759	7.75454	2.07737	1.07398	1.66755
	OR5309_10	62.3225	1.06166	1.5539	0.951805		240.439	527.622	696.345	203.8	281.431	5.01792	3.42581	2.90042	2.58344	89.5272	30.9267	4.62082	2.52621	1.41324	2.2151
	OR5309_11	59.71	1.02762	1.55818	0.918955		372.467	1329.45	2212.73	116.537	214.218	13.3861	6.13709	4.14385	2.48613	93.9786	87.5843	5.08607	2.24055	1.29854	1.07768
	OR5309_12	59.02	1.02545	1.98821	0.9065		319.061	1299.87	2515.16	83.6249	110.933	3.23217	5.80679	4.25852	3.29691	63.312	74.8894	4.52341	1.66641	0.529868	0.905062
	OR5309_13	59.845	1.01191	1.60027	1.02799		482.193	1223.22	2709.35	86.0269	114.542	4.10673	5.27003	4.18931	2.34077	52.4986	86.4121	6.94491	1.6472	0.64097	0.771207
	OR5309_14	61.235	1.02748	1.3378	0.805114		384.288	1161.15	2465.99	145.494	325.065	3.95493	5.84338	3.44499	2.86992	127.703	68.2022	4.24103	2.51157	1.90486	1.30472
	OR5309_15	60.5833	1.03588	1.18619	0.831761		262.072	1034.83	2338.7	180.579	281.528	3.92587	4.66838	3.38442	3.35178	52.4472	48.2895	13.9391	2.58553	1.30536	1.99372
	OR5309_16	62.035	1.08461	1.35075	0.972992		362.148	983.833	1934.3	155.469	206.982	13.2357	4.22349	3.84175	3.48811	71.4138	48.3935	4.57868	3.21898	2.45163	1.93809
	OR5309_17	62.21	1.0202	1.4815	0.776682		284.557	735.524	1285.29	195.461	481.408	1.46103	5.58409	2.50364	2.63305	210.084	40.8353	9.13161	3.7509	3.56404	2.40942
	OR5309_18	61.1425	1.06827	1.48054	0.793756		393.446	666.852	2401.18	168.549	394.091	1.5385	3.78702	2.19882	1.91173	138.442	38.3684	5.03929	2.78739	2.45996	1.57481
	OR5309_19	61.368	1.11095	1.56178	0.914603		275.345	640.407	2040.73	212.194	305.996	4.49967	2.87128	2.84904	2.59589	46.7928	30.8726	3.49343	2.28988	1.4225	1.53369
	OR5309_20	62.25	1.01922	1.23504	0.795831		188.683	574.299	1643.99	202.626	316.136	1.34479	2.96521	2.72448	2.56797	49.2685	30.7772	6.60351	2.12329	1.2645	1.82622
	OR5309_21	63.08	0.993159	1.31729	0.807531		160.195	500.01	645.7	184.574	292.641	14.8424	4.32347	2.54141	2.57363	85.89	29.053	9.72434	2.51473	1.31997	2.19198
	OR5309_22	62.5767	1.05252	1.39062	0.885476		174.949	453.254	452.473	200.318	292.003	<d.l.	3.21584	2.57781	2.56691	106.739	45.1831	5.38699	3.03472	1.32582	2.23487
	BM.1985,MI29629 2/2_1	61.035	0.540644	2.82634	0.730413		149.098	11.9756	57.8542	16.1514	959.359	2684.78	1.96429	1.40394	6.92601	1264.46	<d.l.	10.299	1.66705	0.0343619	0.250734
	BM.1985,MI29629 2/2_2	61.63	0.578306	3.13318	0.830187		92.9228	7.22627	25.3932	13.8185	953.914	3961.33	1.73024	0.92585	7.05807	1073.68	0.466892	11.9789	1.55791	0.0366312	0.280994
	BM.1985,MI29629 2/2_3	61.01	0.622416	2.98935	0.780547		107.56	24.8936	150.943	12.7124	745.628	4630.47	2.35505	2.75718	8.20556	926.4	0.65904	18.9794	1.67318	0.0409894	0.236624
	BM.1985,MI29629 2/2_4	60.97	0.613256	2.98497	0.808761		86.955	8.43015	28.341	14.0779	1046.39	4722.16	1.47009	1.08022	6.57789	1149.99	0.565927	14.977	1.58078	0.0327505	0.259027
Max.		64.72	1.69947	4.62276	1.60851		754.003	2732.76	3029.81	906.994	2429.12	4722.16	47.9906	43.8832	23.5104	1264.46	97.782	107.567	11.0399	24.4251	25.8897
Min.		54.53	0.260515	0.835888	0.386509		52.2394	0.658871	21.4178	3.59094	20.1753	1.1527	1.47009	0.735324	1.34613	8.6925	0.175779	0.262934	0.683483	0.0177934	0.139719
Mean		61.4012	1.13673	2.27582	0.880191		267.894	690.48	738.015	215.472	303.287	268.03	8.73939	5.9116	5.74301	190.633	39.4196	19.7534	2.53092	2.14008	3.30102
St. Dev		1.55097	0.313952	1.11558	0.300494		125.566	809.705	936.899	225.213	354.11	992.747	9.07617	7.78896	4.21418	279.687	31.3449	24.1226	2.29218	4.95953	5.68403
d.l. detection limit

## Sheet: Table S3
Table S3. LA-ICP-MS Secondary standard values.
	NIST 610			BC_28
	(standard )	(average)*		(standard)	(average)*
24Mg	432	404.036	13.9819	11618	11827.8	104.895
27Al	10320	8724.39	797.807	20787	20499.5	143.752
45Sc	455	401.407	26.7963	31	25.5128	2.74361
47Ti	452	389.252	31.3738	87615	74962.2	6326.38
51V	450	397.886	26.0569	9603	9402.17	100.415
53Cr	408	354.65	26.6748	1172	1292.75	60.3727
55Mn	444	391.251	26.3747	2125	1998.96	63.019
59Co	410	350.786	29.607	241	292.445	25.7225
60Ni	458.7	387.836	35.432	573	574.355	0.677467
66Zn	460	384.075	37.9623	588	439.888	74.056
69Ga	433	366.607	33.1966	41.1	48.2382	3.56908
74Ge	433	306.005	63.4973	0.86	0.712087	0.0739567
89Y	462	416.445	22.7773	­	­
139La	440	393.216	23.3922	­	­
140Ce	453	403.562	24.7189	­	­
141Pr	448	397.762	25.1189	­	­
146Nd	453	379.454	36.7728	­	­
147Sm	430	396.435	16.7825	­	­
153Eu	447	401.316	22.842	­	­
157Gd	449	401.36	23.82	­	­
159Tb	437	391.883	22.5583	­	­
163Dy	437	373.931	31.5344	­	­
165Ho	449	401.707	23.6466	­	­
166Er	455	393.617	30.6914	­	­
169Tm	435	387.21	23.8951	­	­
172Yb	450	395.858	27.0712	­	­
175Lu	439	397.079	20.9606	­	­
208Pb	426	380.351	22.8244	­	­
*the average values are calculated from the results of La-ICPMS; - n.d.

## Sheet: Table S4
Table S4. Mineral chemistry of goethites from the Zn-nonsulfides of Hakkari and Jabali. Major and minor elements were analyzed through EMPA (wt%), while trace elements were analyzed through LA-ICP-MS
		internal-standard--57Fe	29Si	208Pb	66Zn		43Ca	27Al	24Mg	55Mn	51V	53Cr	60Ni	71Ga	72Ge	238U	47Ti	59Co	89Y	139La	140Ce
	Specimen point	%					ppm
	of analysis
HAKKARI	H2050_1	46.6	1.95216	5.0819	5.87276		1200.75	1282.48	219.281	2.06401	33.0354	11.2154	11.738	9.55515	27.142	17.6985	0.5252	0.0531886	1.5852	1.50394	0.63747
	H2050_2	46.85	1.85989	5.09159	5.66119		831.726	962.614	197.417	2.37976	39.6166	4.49669	10.5291	10.7917	29.5919	17.1396	0.55055	0.102694	1.76626	1.55218	0.601256
	H2050_3	45.44	2.22523	6.60654	6.56521		1652.2	989.363	225.759	3.91928	45.8907	178.601	13.6482	10.2988	26.0462	14.2981	0.3263	0.03094	2.13576	2.22046	1.05521
	H2050_4	46.52	3.09143	8.98185	8.10261		2151.38	593.159	322.876	3.50039	52.2106	22.0035	30.6139	21.9857	33.1453	11.665	3.62299	0.13845	2.48313	2.83122	1.14657
	H2050_5	44.95	1.80532	5.98555	5.54331		1179.26	982.446	203.648	2.0676	61.5681	7.31719	13.1972	12.5651	31.7921	18.6172	7.78917	0.0714078	1.85761	1.93266	0.808733
	H2050_6	46.54	1.46317	5.08154	5.02014		1274.9	504.456	203.401	15.5235	136.623	14.9623	11.3063	14.1318	36.3024	9.76324	1.23571	0.303604	2.28892	1.8775	1.06322
	H2050_7	44.47	1.91852	5.14478	6.05958		1436.89	786.438	219.388	7.5577	64.6149	10.792	13.2734	10.7224	28.5283	14.9128	0.338	0.0539818	1.74809	1.91388	1.95796
	H2050_8	50.73	1.54128	5.38765	4.8383		1488.55	697.195	248.452	4.50718	156.525	12.8516	11.4463	14.9802	38.3806	11.2419	7.40996	0.055573	1.90144	1.87727	1.07878
	H2050_9	44.02	2.67109	4.12493	6.44569		1088.32	3258.65	385.54	7.5185	32.6334	10.1337	18.9598	28.8796	18.3305	9.12178	25.7259	0.027755	0.560306	1.15407	0.986672
	H2050_10	46.32	1.93809	6.38907	6.48057		1898.1	1555.36	271.47	21.758	193.88	15.04	16.562	15.9768	27.9892	21.0182	113.494	0.0530909	2.84118	2.94674	3.23871
	H2050_11	46.98	1.74766	6.88846	5.38125		2054.53	1798.62	264.577	19.6039	235.578	17.864	14.9743	13.8046	30.3696	22.2641	29.8841	0.0797942	2.87641	3.20226	4.19208
	H2050_12	46.51	1.13067	5.14445	3.71565		2181.09	710.471	193.704	53.1413	311.72	13.7574	8.77347	17.2878	32.6458	10.7742	40.2316	0.0777064	1.55643	2.78587	2.39286
	H2050_13	45.54	2.45984	5.34601	5.57056		1135.82	60.8266	204.055	11.1154	36.035	19.8129	24.7875	18.5073	20.6259	10.0295	0.52585	0.237586	3.21954	4.08365	7.06055
	H2058-1	41.39	2.68774	7.46956	5.43116		1259.67	76.298	210.08	30.1152	15.6158	26.6767	31.541	18.7769	27.0005	12.8827	0.6825	0.666166	0.839038	1.43343	3.30558
	H2058-2	44.26	2.57104	6.48456	5.98057		1316.81	82.9041	214.782	24.8661	36.3327	41.6621	25.6865	21.2939	19.0988	9.9281	0.56225	0.454716	2.79625	3.92499	6.92181
	H2058-3	44.91	2.84192	8.82886	5.21794		1756.93	83.7955	216.694	28.4279	23.1948	97.4337	28.1383	15.8016	22.023	13.7166	0.24895	0.883212	1.04377	2.05412	2.99373
	H2058-4	43.15	2.23084	5.91304	5.35435		1350.02	83.3561	211.432	7.81752	18.5937	36.5888	29.1387	23.188	17.6962	7.89338	0.3796	0.383963	1.76898	2.96426	4.76103
	H2058-5	43.42	3.00877	8.05488	6.07446		1710.15	124.989	261.14	25.3334	15.7636	55.2252	37.5969	29.6745	32.5259	16.607	0.38935	0.292917	0.761431	1.40693	1.2907
	H2058-6	34.73	2.26658	5.81642	5.13903		1334.79	142.613	209.637	5.87427	14.0997	50.1745	31.8482	28.7989	28.1862	11.1141	0.3575	0.177429	0.620158	1.0683	0.248299
	H2058-7	42.9	2.31919	5.26878	5.37388		1298.51	61.2439	212.628	6.82464	13.1445	49.0159	26.6114	21.4228	15.6814	8.2226	0.27235	1.23034	0.822543	2.42865	4.28504
	H2058-8	36.75	2.36283	7.03385	4.08414		1546.63	66.7465	167.856	70.7826	25.8401	61.8868	19.4497	12.0689	16.4951	9.98272	0.13845	0.961935	1.29746	2.34882	5.00653
	H2058-9	41.47	2.56535	5.9746	6.10464		1320.33	152.763	273.605	5.98398	17.8402	34.0511	36.2684	35.7253	28.4389	11.9622	0.35165	0.210058	0.827606	1.30571	0.726668
	H2058-10	44.31	2.42561	5.12065	5.84315		1239.02	95.761	234.613	7.2815	14.5836	34.9136	30.8571	24.548	17.1924	9.24993	0.4342	1.47918	0.728077	2.50857	4.17988
	H2058-11	44.62	2.22708	5.46174	5.59686		1433.6	227.414	231.131	7.3442	17.7102	33.4097	26.3232	24.6158	16.2946	7.92518	0.732393	0.227562	1.47055	4.56658	10.3222
	H2058-12	45.68	2.69463	4.78255	7.09277		1276.2	203.712	265.268	5.31697	30.5981	38.0182	35.5751	30.2128	23.1571	8.62716	1.53601	0.120017	1.20493	1.68221	1.78432
	H2058-13	45.85	2.51065	4.65447	7.85256		840.653	188.391	188.246	30.786	12.1309	9.02333	20.1068	29.9891	20.0667	8.87653	0.44005	0.03588	0.390199	1.02971	0.428082
	H2058-14	41.29	2.40239	3.93985	7.05273		1053.95	612.72	155.776	4.54772	21.617	28.4483	22.5553	22.0276	16.375	6.24288	2.14596	0.104935	0.67047	1.44164	2.14091
	H2058-15	42.75	3.01225	5.39517	4.81918		1064.56	214.957	218.474	12.1525	9.73346	26.3581	32.056	43.4181	20.9351	7.02731	1.313	0.063115	0.259514	0.576364	0.108325
Max.			3.09143	8.98185	8.10261		2181.09	3258.65	385.54	70.7826	311.72	178.601	37.5969	43.4181	38.3806	22.2641	113.494	1.47918	3.21954	4.56658	10.3222
Min.			1.13067	3.93985	3.71565		831.726	60.8266	155.776	2.06401	9.73346	4.49669	8.77347	9.55515	15.6814	6.24288	0.13845	0.027755	0.259514	0.576364	0.108325
Mean			2.28326	5.90905	5.79551		1406.26	592.848	229.676	15.2897	60.2403	34.3477	22.6272	20.7517	25.0735	12.1001	8.63014	0.306329	1.51147	2.16507	2.66868
St. Dev			0.487286	1.26919	0.979909		354.832	715.446	46.3572	16.2059	75.9776	34.9014	8.96783	8.46099	6.70097	4.26268	22.8614	0.386376	0.833693	0.975159	2.45938
JABALI	JSMON 30-1	51.4	0.713642	0.0744845	1.61347		3032.28	3016.54	349.783	1485.33	15.1002	1.17715	6.37902	0.343279	9.78968	2.75603	6.57748	0.21569	0.645303	0.514282	1.45423
	JSMON 30-2	51.2	0.669651	0.0686685	1.50204		769.012	2802.14	302.195	1328.87	15.2263	1.20187	5.89358	0.332354	8.86337	2.47726	8.15615	0.202436	0.68015	0.504882	1.39327
	JSMON 30-3	50.24	0.708399	0.0653848	2.0224		815.079	4129.2	361.013	1377.13	12.8536	1.37867	8.10375	0.460011	12.4328	4.6609	4.067	0.200846	0.846074	0.5939	1.96101
	JSMON 30-4	49.87	0.651529	0.0643625	1.58145		686.406	3808.45	381.138	1244.48	14.4081	1.64965	8.92702	0.35544	9.34745	3.96527	5.70554	0.20588	0.70388	0.53925	1.71793
	JSMON 30-5	51.98	0.940183	0.155587	1.08731		4766.07	2286.42	2794.55	692.963	10.2703	2.41457	8.12782	0.533842	9.69092	3.19183	12.3615	0.243229	0.457649	0.332101	0.476023
	JSMON 30-6	49.96	0.693124	0.0632967	1.59095		1388.24	3675.77	362.206	1225.09	14.3527	1.19943	7.84044	0.335958	10.2471	4.04534	6.49565	0.209909	0.751244	0.595213	1.77578
	JSMON 30-7	50.73	0.696225	0.0684102	1.93185		825.662	4033.04	369.91	1659	13.4548	1.17834	8.8018	0.386732	10.576	4.49924	3.38528	0.215332	0.836549	0.612107	2.68445
	JSMON 30-8	51.82	0.715717	0.0677074	1.49009		819.706	3632.06	361.363	1351.19	13.7634	1.37336	8.40837	0.434484	10.4134	3.80777	2.8702	0.197791	0.718066	0.543366	1.7954
	JSMON 30-9	50.78	0.674534	0.0677169	1.68727		788.45	4244.59	395.083	1429.19	13.3783	2.05917	8.09473	0.37428	10.9022	4.88809	8.30918	0.209089	0.763097	0.539388	2.09137
	JSMON 30-10	51.71	0.739735	0.0668125	1.59692		744.979	3936.42	379.679	1427.44	14.1866	0.6266	8.48847	0.433872	10.8875	4.24103	6.04995	0.191197	0.83501	0.586336	1.92839
	JSMON 30-11	51.57	0.747907	0.071307	1.65734		924.025	3843.28	382.029	1336.49	14.3439	1.45376	9.15844	0.404073	11.6738	4.27241	3.45633	0.233682	0.747863	0.571091	1.81458
	JSMON 30-12	51.57	0.672786	0.06116	1.65008		758.07	4224.17	391.377	1245.76	13.7284	1.52075	8.96081	0.371094	9.56635	4.71035	10.1113	0.22097	0.76452	0.653157	1.86271
	JSMON 30-13	51.8	0.931759	0.124879	1.09565		2282.88	3159.57	2193.77	916.848	11.9572	4.09725	8.85529	0.811814	6.0318	4.11113	12.6255	0.235751	0.613631	0.363176	0.616276
Max.			0.940183	0.155587	2.0224		4766.07	4244.59	2794.55	1659	15.2263	4.09725	9.15844	0.811814	12.4328	4.88809	12.6255	0.243229	0.846074	0.653157	2.68445
Min.			0.651529	0.06116	1.08731		686.406	2286.42	302.195	692.963	10.2703	0.6266	5.89358	0.332354	6.0318	2.47726	2.8702	0.191197	0.457649	0.332101	0.476023
Mean			0.735015	0.0784444	1.57745		1430.84	3599.36	694.161	1286.14	13.6172	1.64081	8.15689	0.429018	10.0325	3.97128	6.93624	0.213985	0.720233	0.534481	1.65934
St. Dev			0.0933454	0.0283325	0.263765		1228.81	604.959	808.558	246.869	1.33745	0.858414	0.987859	0.128474	1.54553	0.745699	3.25784	0.0157171	0.106407	0.0926782	0.584732
d.l. detection limit

## Sheet: Table S5
Table S5. Summary of Principal Component Analysis.
	PC1	PC2	PC3	PC4	PC5	PC6	PC7	PC8	PC9	PC10	PC11	PC12	PC13	PC14	PC15
St. Deviation	1.9439	1.8229	1.4098	1.3206	1.04735	0.90374	0.83623	0.69865	0.5616	0.46058	0.45581	0.34228	0.31617	0.27887	0.18857
% of expl. variance	25.19	22.15	13.25	11.63	7.313	5.445	4.662	3.254	2.103	1.414	1.385	0.781	0.666	0.518	0.237
Cumulative expl. variance	25.19	47.34	60.59	72.22	79.534	84.979	89.641	92.895	94.998	96.412	97.797	98.578	99.244	99.763	100
